# Supplementary material for: Expanding the Noonan spectrum/RASopathy NGS panel: Benefits of adding NF1 and SPRED1
Source: PubMed Central journal article supplement (PMC7196473; doi:10.1002/mgg3.1180), 2020-02-27
Supplement: MGG3-8-e1180-s001.pdf [file MGG3-8-e1180-s001.pdf]

**Supplementary Table S1. RASopathy Genes on NGS Panel**

| Gene          | Transcript     |
|---------------|----------------|
| <i>BRAF</i>   | NM_004333.4    |
| <i>CBL</i>    | NM_005188.3    |
| <i>HRAS</i>   | NM_005343.2    |
| <i>KRAS</i>   | NM_004985.3    |
| <i>MAP2K1</i> | NM_002755.3    |
| <i>MAP2K2</i> | NM_030662.3    |
| <i>NF1</i>    | NM_001042492.2 |
| <i>NRAS</i>   | NM_002524.4    |
| <i>PTPN11</i> | NM_002834.4    |
| <i>RAF1</i>   | NM_002880.3    |
| <i>RIT1</i>   | NM_001256821.1 |
| <i>SPRED1</i> | NM_152594.2    |
| <i>SOS1</i>   | NM_005633.3    |
| <i>SHOC2*</i> | NM_007373.3    |

**\*Tested for the only known pathogenic (c.4A>G (p.Ser2Gly)) variant in exon**

**Supplementary Table S2. Variants of Unknown Significance (VUSs) in *NF1* and *SPRED1* Identified on RASopathy Panel**

| Gene          | cDNA         | Protein        | Variant classification (ACMG/AMP Criteria) | Probands |
|---------------|--------------|----------------|--------------------------------------------|----------|
| <i>NF1</i>    | c.2410-12T>C | p.(?)          | VUS (PM2, PP3)                             | 1        |
| <i>NF1</i>    | c.3883A>G    | p.(Thr1295Ala) | VUS - favor benign (BP4, PM2, BS2)         | 1 †      |
| <i>NF1</i>    | c.4624C>G    | p.(Leu1542Val) | VUS (PM2)                                  | 1        |
| <i>NF1</i>    | c.4835G>T    | p.(Arg1612Met) | VUS (PP3, PM2)                             | 1        |
| <i>NF1</i>    | c.5481C>G    | p.(Ile1827Met) | VUS (PM2)                                  | 1        |
| <i>NF1</i>    | c.5509G>A    | p.(Asp1837Asn) | VUS (PM2_P)                                | 1        |
| <i>NF1</i>    | c.6161T>A    | p.(Met2054Lys) | VUS (PM2, PP3)                             | 1 ‡      |
| <i>NF1</i>    | c.6172A>G    | p.(Ile2058Val) | VUS (BS1_P)                                | 1        |
| <i>NF1</i>    | c.6617C>T    | p.(Thr2206Ile) | VUS - favor benign (PM2, PP3, BS2)         | 1 †      |
| <i>NF1</i>    | c.7439A>G    | p.(His2480Arg) | VUS (PP3)                                  | 1        |
| <i>NF1</i>    | c.7988C>T    | p.(Ser2663Phe) | VUS - favor benign (PM2, PP3, BS2)         | 1 †      |
| <i>NF1</i>    | c.8162A>G    | p.(Gln2721Arg) | VUS (PM2)                                  | 1 §      |
| <i>SPRED1</i> | c.-12G>T     | p.(?)          | VUS (PP3, BS1_P)                           | 1        |
| <i>SPRED1</i> | c.424-5A>G   | p.(?)          | VUS (BP4)                                  | 1        |
| <i>SPRED1</i> | c.587C>T     | p.(Thr196Ile)  | VUS - favor benign (BP4, BS1_P)            | 1        |

†Also identified in unaffected parent

‡In homozygous state in proband with a RASopathy and affected sibling

§Also identified in parent, phenotype unknown
